# Supplementary material for: Genome-wide transcriptome analyses of developing seeds from low and normal phytic acid soybean lines
Source: PubMed Central journal article supplement (PMC4683714; doi:10.1186/s12864-015-2283-9), 2015-12-18

(a) MIPS1

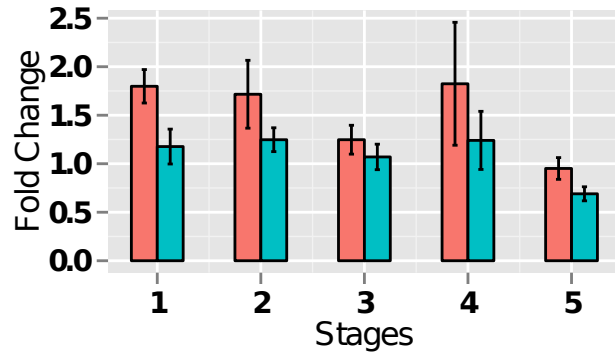

(b) MRP-L

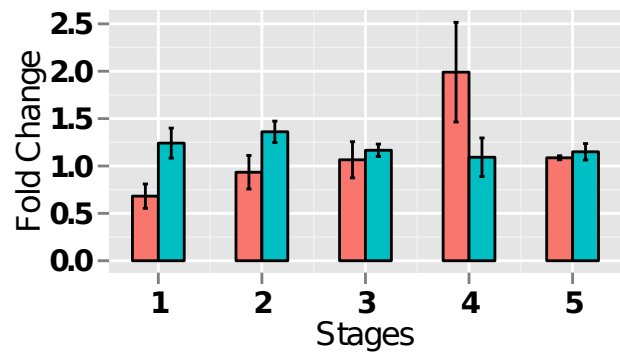

(c) MRP-N

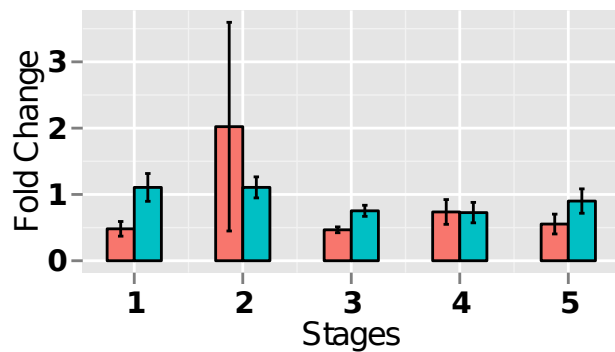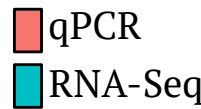

Supplement: 12864_2015_2283_MOESM2_ESM.pdf [file 12864_2015_2283_MOESM2_ESM.pdf]
